# Supplementary material
Source: PubMed Central journal article supplement (PMC4268226)

**Supplementary Materials for:**

**Homology modeling, molecular dynamics, and site-directed mutagenesis study of AlkB human homolog 1 (ALKBH1)**

Pavel Silvestrov<sup>a</sup>, Tina A. Müller<sup>b</sup>, Kristen N. Clark<sup>b</sup>, Robert P. Hausinger<sup>b</sup>, G. Andrés Cisneros<sup>a,\*</sup>

**Supplementary Table S1**

Primers and plasmids used to create ABH1 variants.

| Plasmid | Variant                 | Primers                                                                                                      | Based on plasmid |
|---------|-------------------------|--------------------------------------------------------------------------------------------------------------|------------------|
| pABH175 | H113A                   | for 5' CAGGTTACCAGTGGGCGTGGGTGAAACAGTGC 3'<br>rev 5' GCACTGTTTCACCCACGCCCACTGGTAACCTG 3'                     | pBAR67           |
| pABH136 | C118A                   | for 5' GGCAGTGGGTGAAACAGGCGCTTAAGTTATATTCCC 3'<br>rev 5' GGGAATATAACTTAAGCGCCTGTTTCACCCAGTGCC 3'             | pBAR67           |
| pABH137 | C129A                   | for 5' CCCAGAAACCTAATGTAGCGAACCTGGACAAACACATG 3'<br>rev 5' CATGTGTTTGTCCAGGTTTCGCTACATTAGGTTTCTGGG 3'        | pBAR67           |
| pABH190 | H134A                   | for 5' GTATGTAACCTGGACAAAGCGATGTCTAAAGAAGAGACCC 3'<br>rev 5' GGGTCTCTTCTTTAGACATCGCTTTGTCCAGGTTACATAC 3'     | pBAR67           |
| pABH191 | H303A                   | for 5' GGAAGGCCTGCCTGCGTGCCTAGAGGCAC 3'<br>rev 5' GTGCCTCTAGGCACGCAGGCAGGCCTTCC 3'                           | pBAR67           |
| pABH139 | C304A                   | for 5' GCCTGCCTCACGCGCTAGAGGCACCT 3'<br>rev 5' AGTGCCTCTAGCGCGTGAGGCAGGC 3'                                  | pBAR67           |
| pABH142 | C371A                   | for 5' CATCAGTACAGAAGGTTTCGCGCATCTGGATGACCAGAATAG 3'<br>rev 5' CTATTCTGGTCATCCAGATGCGCGAAACCTTCTGTACTGATG 3' | pBAR67           |
| pABH192 | H372A                   | for 5' GTACAGAAGGTTTCTGCGCGCTGGATGACCAGAATAG 3'<br>rev 5' CTATTCTGGTCATCCAGCGCGCAGAAACCTTCTGTAC 3'           | pBAR67           |
| pABH187 | H113A/C129A             | for 5' CAGGTTACCAGTGGGCGTGGGTGAAACAGTGC 3'<br>rev 5' GCACTGTTTCACCCACGCCCACTGGTAACCTG 3'                     | pABH137          |
| pABH188 | C118A/C129A             | for 5' CCCAGAAACCTAATGTAGCGAACCTGGACAAACACATG 3'<br>rev 5' CATGTGTTTGTCCAGGTTTCGCTACATTAGGTTTCTGGG 3'        | pABH136          |
| pABH193 | H113A/C118A             | for 5' GGGCGTGGGTGAAACAGGCGCTTAAGTTATATTCCC 3'<br>rev 5' GGGAATATAACTTAAGCGCCTGTTTCACCCACGCC 3'              | pABH175          |
| pABH194 | C129A/H134A             | for 5' GTAGCGAACCTGGACAAAGCGATGTCTAAAGAAGAGAC 3'<br>rev 5' GTCTCTTCTTTAGACATCGCTTTGTCCAGGTTTCGCTAC 3'        | pABH137          |
| pABH195 | H303A/C304A             | for 5' GAAGGGGAAGGCCTGCCTGCGGCGCTAGAGGCACCTCTC 3'<br>rev 5' GAGAGGTGCCTCTAGCGCCGCAGGCAGGCCTTCCCCTTC 3'       | pABH139          |
| pABH189 | C304A/C371A             | for 5' CATCAGTACAGAAGGTTTCGCGCATCTGGATGACCAGAATAG 3'<br>rev 5' CTATTCTGGTCATCCAGATGCGCGAAACCTTCTGTACTGATG 3' | pABH139          |
| pABH196 | C371A/H372A             | for 5' GTACAGAAGGTTTCTGCGGCGCTGGATGACCAGAATAG 3'<br>rev 5' CTATTCTGGTCATCCAGCGCCGCAGAAACCTTCTGTAC 3'         | pABH142          |
| pABH203 | H113A/C129A/H134A       | for 5' CAGGTTACCAGTGGGCGTGGGTGAAACAGTGC 3'<br>rev 5' GCACTGTTTCACCCACGCCCACTGGTAACCTG 3'                     | pABH194          |
| pABH204 | H113A/C118A/C129A/H134A | for 5' GGGCGTGGGTGAAACAGGCGCTTAAGTTATATTCCC 3'<br>rev 5' GGGAATATAACTTAAGCGCCTGTTTCACCCACGCC 3'              | pABH203          |

**Supplementary Figure S1.** Sequence alignments (a) between AlkB and the AlkB part of ALKBH1 (b) between DBL and the DBL part of ALKBH1. The residues introduced to the sequences and the overlapping regions are underlined.

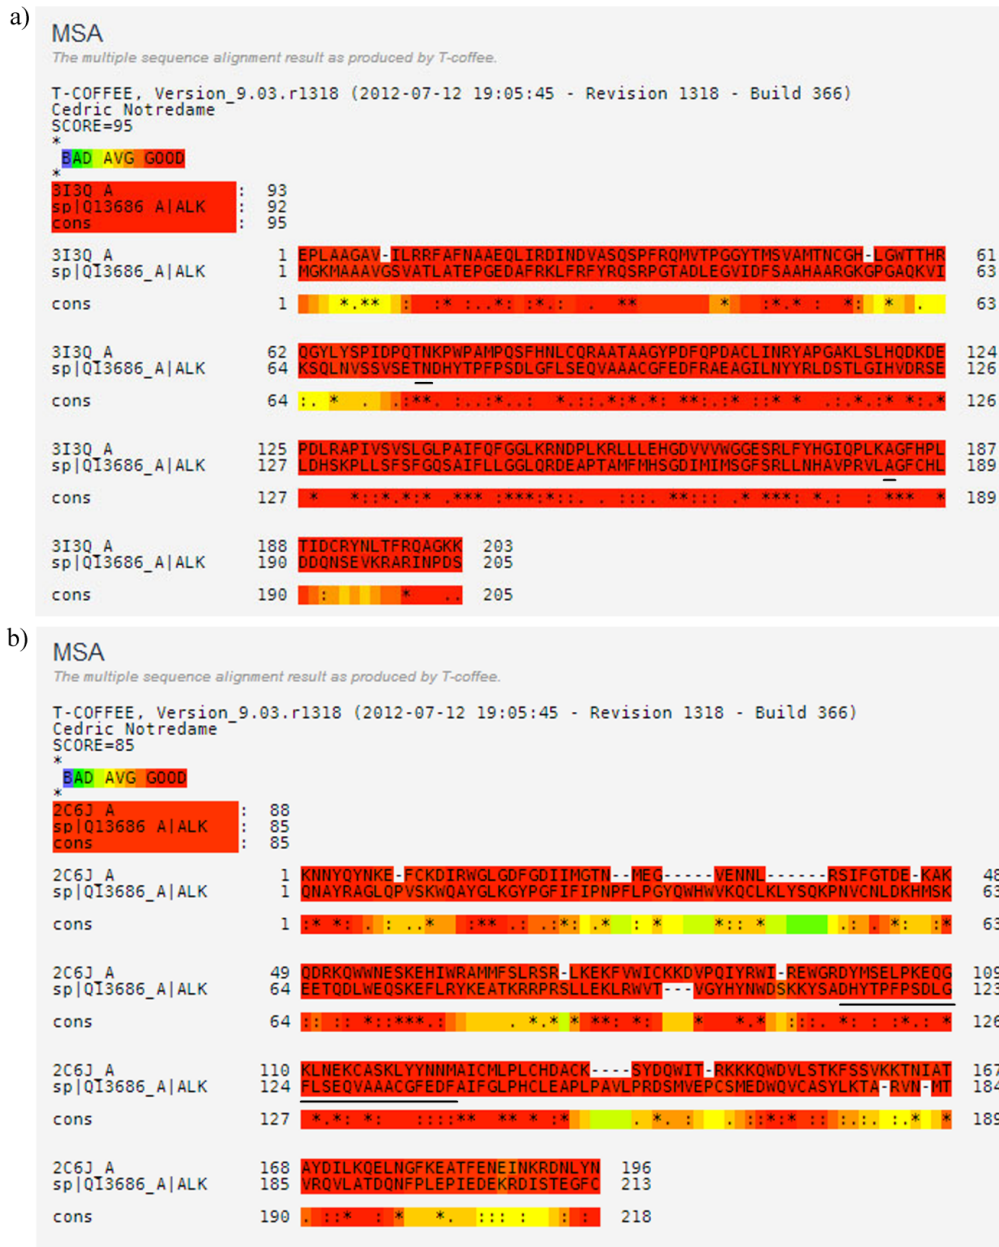

Supplementary Figure S2. Potential energy throughout the MD simulations.

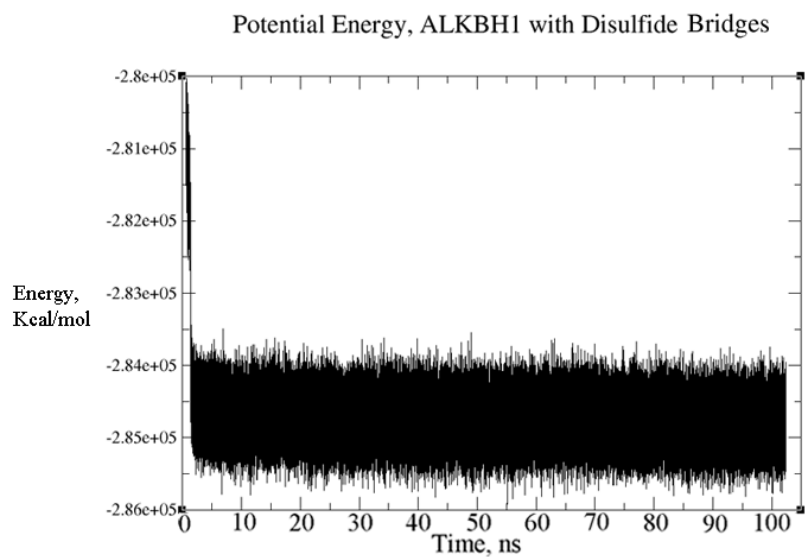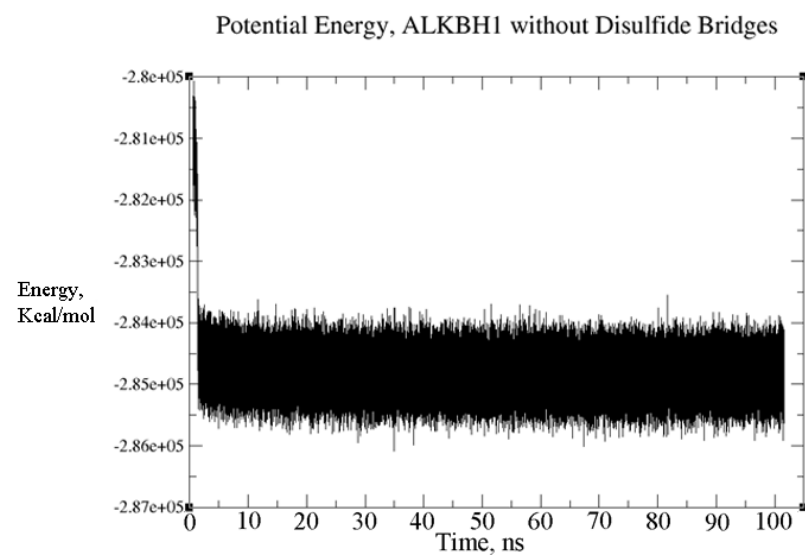

**Supplementary Figure S3.** Dynamics of distances between lysines and serines throughout the 100ns simulation with disulfide bridges are shown for the three pairs: (a) K133 and S136 (b) K154 and S147 (c) K182 and S181.

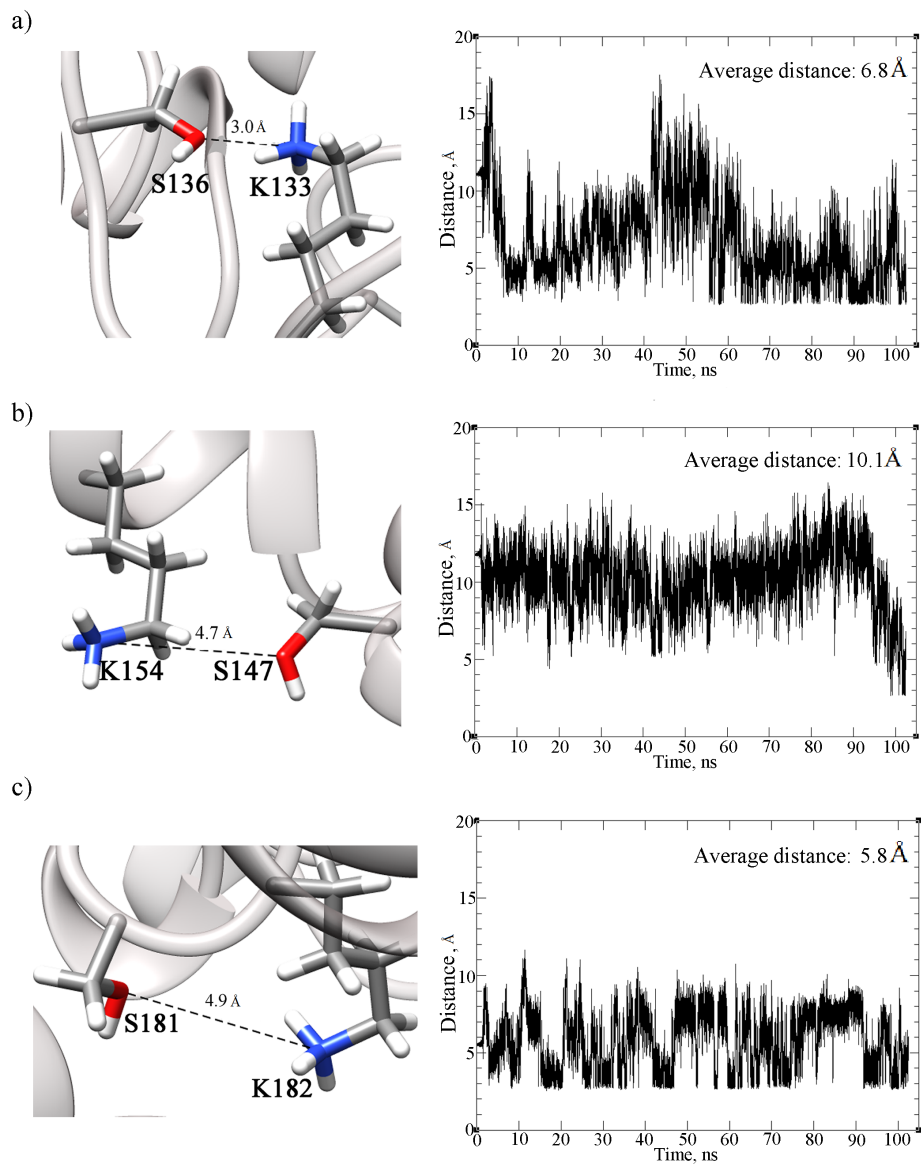

**Supplementary Figure S4.** Residues in proximity to K25. Shown are a snapshot at the 100<sup>th</sup> ns of the simulation with disulfide bridges and the dynamics of distances between the nitrogen of the amino group of K25 and the atoms in nearby residues.

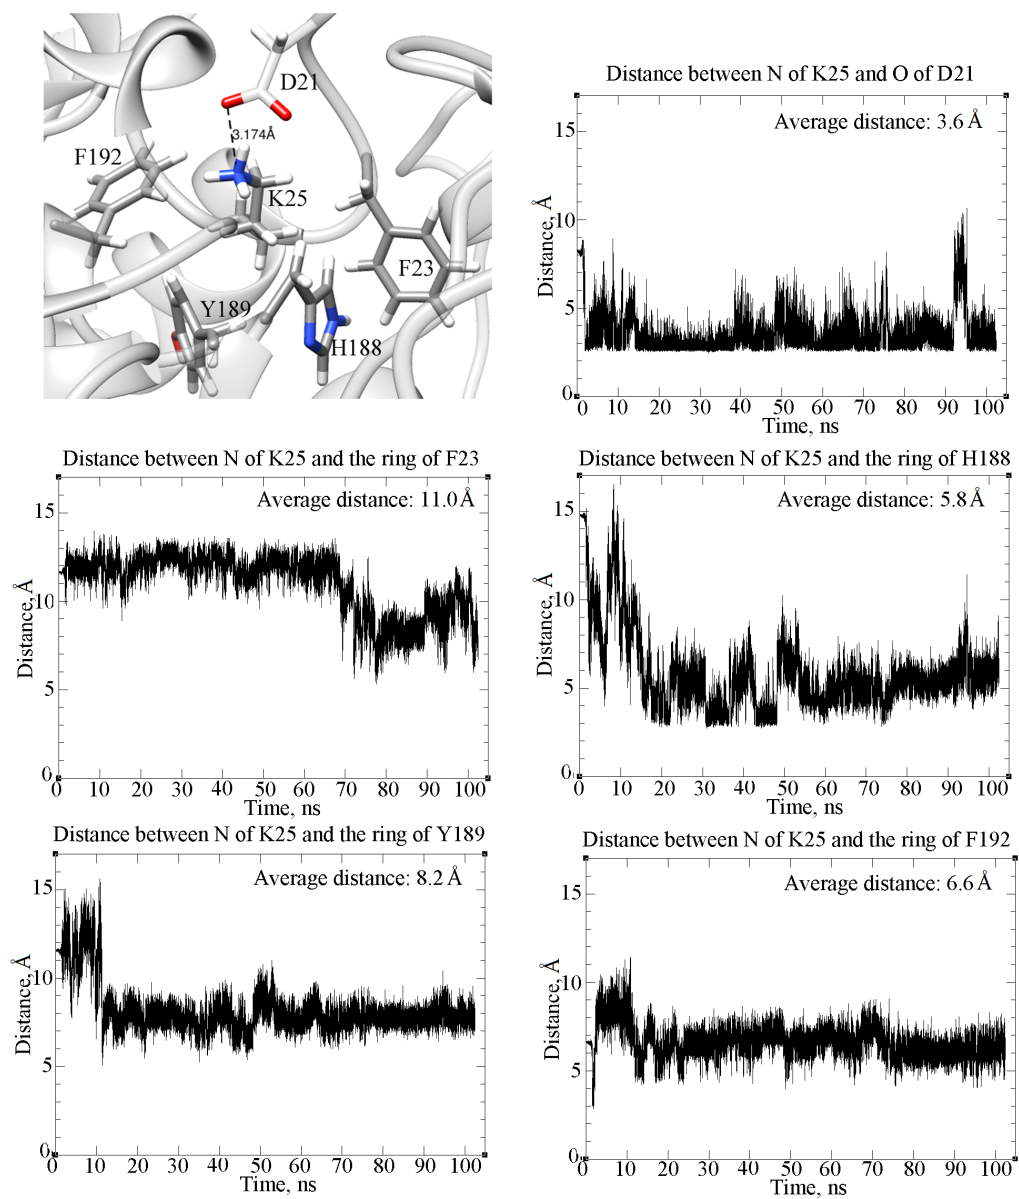

Supplement: NIHMS642376-supplement.pdf [file NIHMS642376-supplement.pdf]
